# Supplementary material for: The Clinical Usefulness of Predictive Models for Preterm Birth with Potential Benefits: A KOrean Preterm collaboratE Network (KOPEN) Registry-Linked Data-Based Cohort Study
Source: PubMed Central journal article supplement (PMC6945556; doi:10.7150/ijms.37626), 2020-01-01
Supplement: ijmsv17p0001s1.pdf [file ijmsv17p0001s1.pdf]

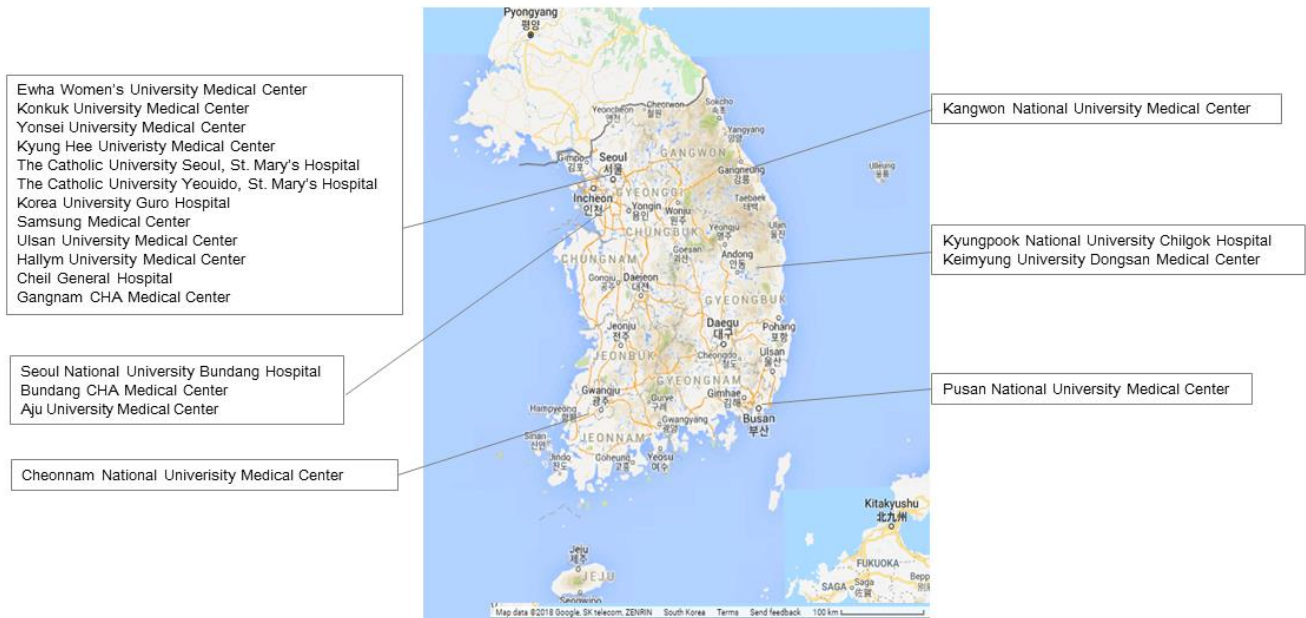

**Figure S1.** The 20 institutes participating in the nationwide preterm care tertiary hospital KOrean Preterm collaboratE Network (KOPEN) registry.

**A**

| Variables                                            | Select Item (Click) | Points       |
|------------------------------------------------------|---------------------|--------------|
| Pelvic falldown sensation                            | No                  | 54           |
| Regular physical activity                            | No                  | 40           |
| Feeling of uterine contraction or uterine tightening | No                  | 40           |
| Maternal weight change rate                          | <30                 | 23           |
| History of circlage                                  | No                  | 0            |
| Varginal bleeding                                    | No                  | 0            |
| CRP                                                  | <0.5                | 0            |
| Pregnancy disease history                            | No                  | 0            |
| Evaluation of sleep quality                          | Normal              | 0            |
| WBC                                                  | <10                 | 0            |
| Drinking                                             | No                  | 0            |
| Gestational age at admission (week)                  | >27                 | 0            |
| Rupture of amniotic membrane                         | No                  | 0            |
| Multiple pregnancy                                   | Single              | 0            |
| <b>Total Points</b>                                  |                     | <b>157</b>   |
| <b>Probability of Risk</b>                           |                     | <b>0.035</b> |

**B**

| Variables                           | Select Item (Click) | Points       |
|-------------------------------------|---------------------|--------------|
| Gestational age at admission (week) | >27                 | 0            |
| Regular physical activity           | No                  | 40           |
| WBC                                 | <10                 | 0            |
| Varginal bleeding                   | No                  | 0            |
| Rupture of amniotic membrane        | No                  | 0            |
| Multiple pregnancy                  | Single              | 0            |
| <b>Total Points</b>                 |                     | <b>40</b>    |
| <b>Probability of Risk</b>          |                     | <b>0.373</b> |

**Figure S2.** An example of the Excel spreadsheet-based risk predictor for individual probability of preterm birth. (A) First, identify if the mother is undergoing preterm delivery before completion of 32 weeks of gestation; if not, move to (B) estimate the probability of preterm delivery between 32 and 37 weeks of gestation.
